# Supplementary material
Source: Springer Nature journal article supplement (https://www.springermedizin.de/resource/supplementary/12876_2013_1091_MOESM4_ESM.pdf/9438422)
Supplement: MOESM4 [file 9438422]

**Table 4: Logistic regression analysis of atrophy (measured as low pepsinogen 1:2 ratio) in relation to potential determinants**

|                                           | Odds Ratio | 95% CI    | <i>P</i> |
|-------------------------------------------|------------|-----------|----------|
| Sex (female)                              | 0.59       | 0.21-1.66 | 0.32     |
| Age (Over 40 years)                       | 0.28       | 0.09-0.83 | 0.02     |
| Micronutrient-antioxidant supplementation | 1.06       | 0.38-3.00 | 0.91     |
| HIV positive                              | 1.51       | 0.44-5.20 | 0.52     |
| Low education                             | 1.62       | 0.41-6.43 | 0.49     |
| Alcohol use                               | 0.85       | 0.58-1.24 | 0.40     |
| Tobacco use                               | 0.86       | 0.17-4.30 | 0.86     |
